# Supplementary material
Source: Copernicus journal article supplement (doi:10.5194/egusphere-2026-1910)
Supplement: Supplementary file 1 [file egusphere-2026-1910-supplement.pdf]

Supplementary Information for

# **Barometric Pumping as a Driver of Subsurface CO<sub>2</sub> Emissions: A Comparative Study of Vadose Zone vs. Groundwater Wells**

Ehud Lavner<sup>1</sup>, Avner Gross<sup>1</sup>, Uri Nachshon<sup>2</sup>, Lior Netzer<sup>3</sup>, Elad Levintal<sup>4,\*</sup>

<sup>1</sup> The Department of Environment, Geoinformatics and Urban Planning Sciences, Ben-Gurion University of the Negev, Beer Sheva, 8410501, Israel

<sup>2</sup> Institute of Soil, Water and Environmental Sciences, Agricultural Research Organization, Rishon Lezion, 7505101, Israel

<sup>3</sup> The Hydrological Service, Israeli Water Authority, Jerusalem, 9195021, Israel

<sup>4</sup> Zuckerberg Institute for Water Research, the Jacob Blaustein Institutes for Desert Research, Ben-Gurion University of the Negev, Sde Boker campus, 8499000, Israel

*Correspondence to:* Elad Levintal (Levintal@bgu.ac.il)

### 1. Data analysis process

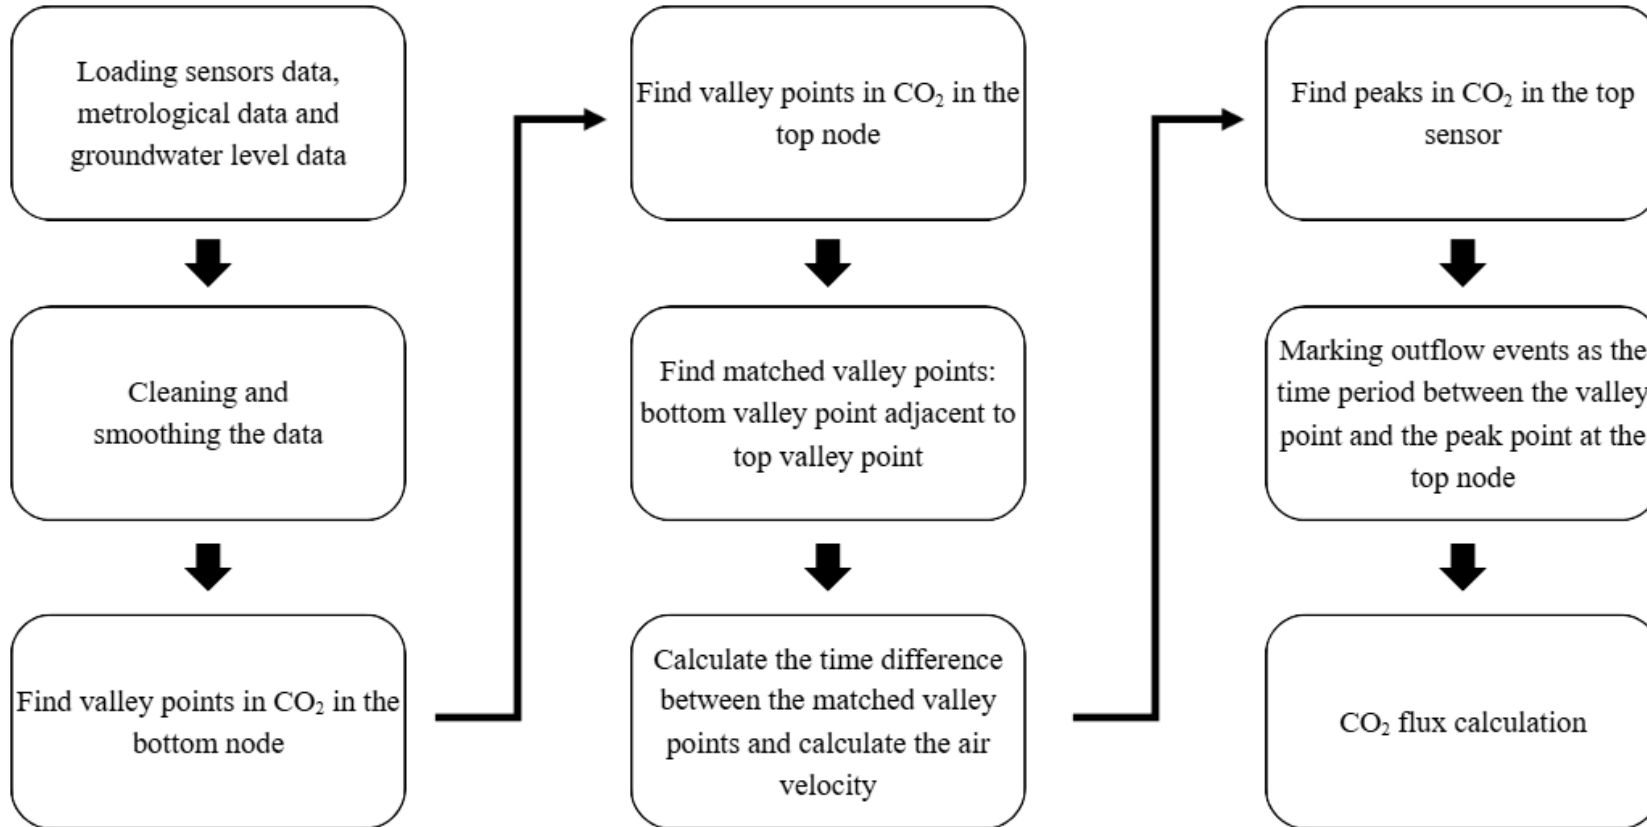

Fig. S1. Flowchart of the data analysis.

## 2. Outflow event

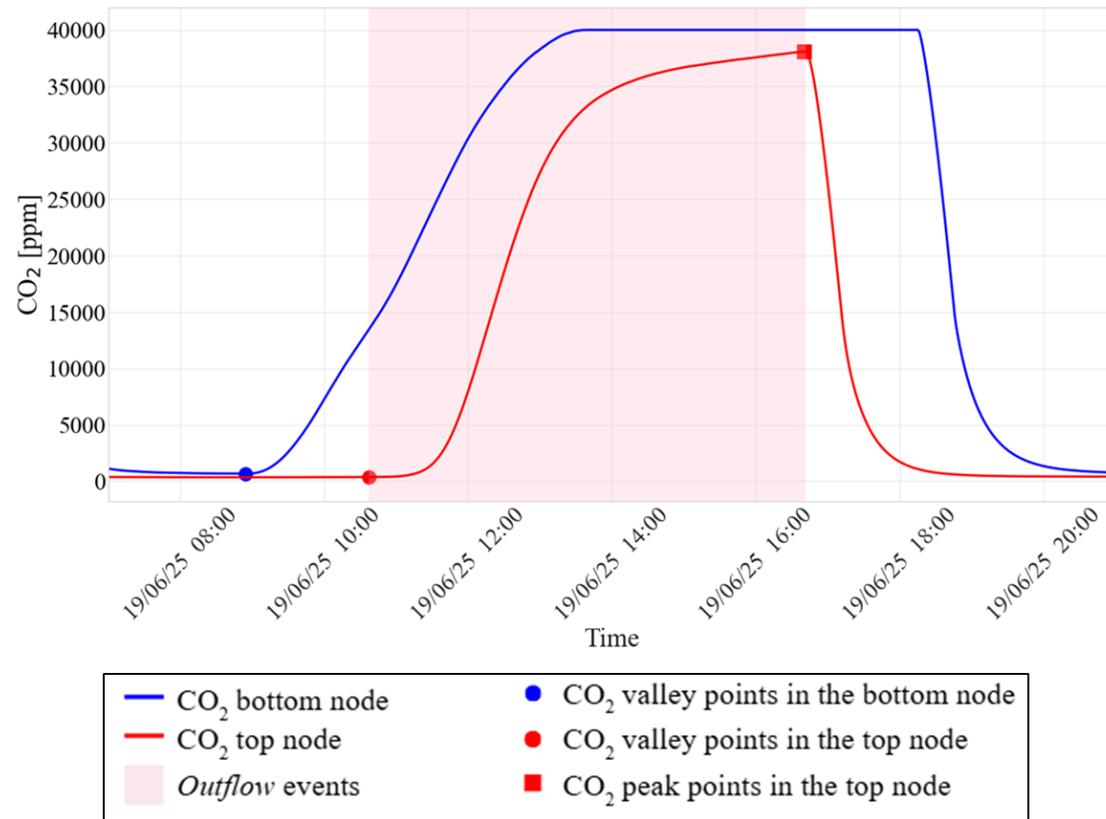

**Fig. S2.** Example of *outflow* event in the dry well. CO<sub>2</sub> valley point is the onset of increasing CO<sub>2</sub> concentrations, and CO<sub>2</sub> peak point is the onset of decreasing CO<sub>2</sub> concentrations.

### 3. One-year time series of the dry well

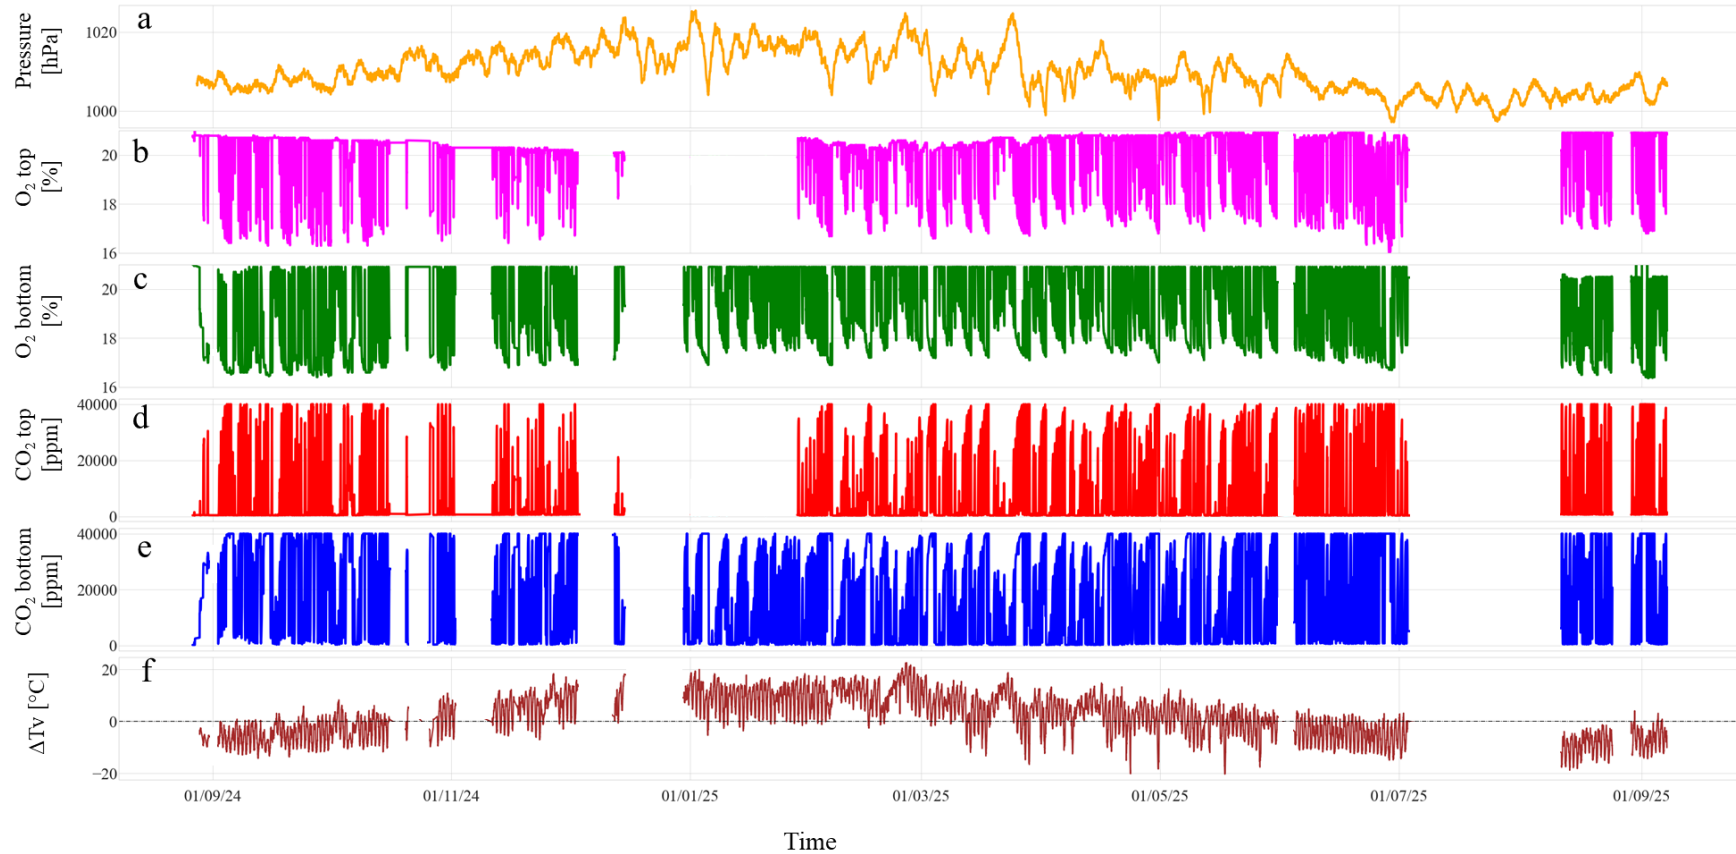

**Fig. S3.** One-year time series data (September 2024 - August 2025) in the dry well. (a) Barometric pressure; (b) O<sub>2</sub> concentrations in the top node; (c) O<sub>2</sub> concentrations in the bottom node; (d) CO<sub>2</sub> concentrations in the top node; (e) CO<sub>2</sub> concentrations in the bottom node; (f)  $\Delta T_V$  between the bottom node and the atmosphere ( $T_{V(\text{bottom})} - T_{V(\text{atm})}$ ); positive values indicates thermal instability conditions. Blank areas indicate missing data due to system malfunctions.

4. Time lags between barometric pressure's peak and the start of *outflow* event

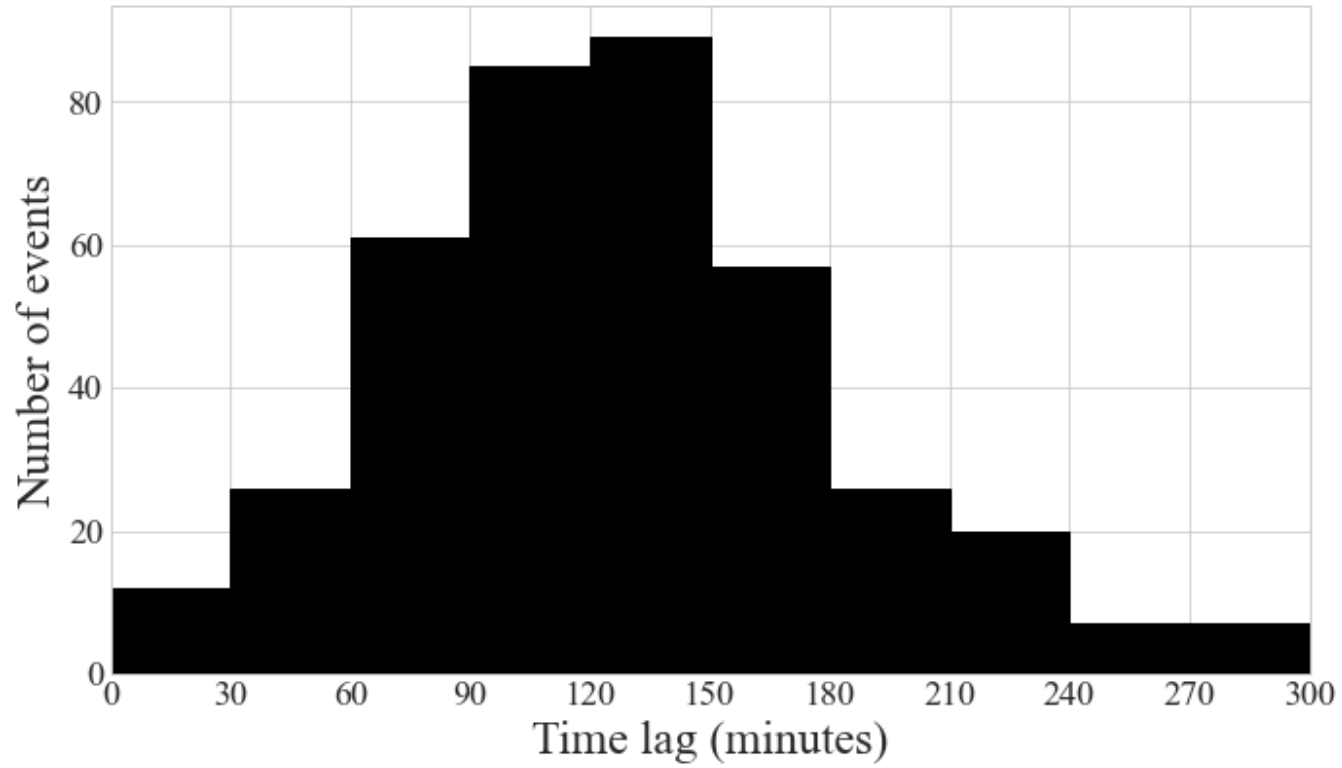

Fig. S4. Histogram of the time lags between the barometric pressure's peaks and the start of *outflow* events.
